# Supplementary material for: Low temperature synergistically promotes wounding-induced indole accumulation by INDUCER OF CBF EXPRESSION-mediated alterations of jasmonic acid signaling in Camellia sinensis
Source: PubMed Central journal article supplement (PMC7242085; doi:10.1093/jxb/erz570), 2020-01-04
Supplement: erz570_suppl_supplementary_materials.pdf [file erz570_suppl_supplementary_materials.pdf]

**Title:** Low temperature synergistically promotes wounding-induced indole accumulation by INDUCER OF CBF EXPRESSION-mediated alterations of jasmonic acid signaling in *Camellia sinensis*

**Running title:** Dual stresses and indole formation in tea

**Authors:** Ying Zhou <sup>1,2,†</sup>, Lanting Zeng <sup>1,2,†</sup>, Xingliang Hou <sup>1</sup>, Yinyin Liao <sup>1,2</sup>, Ziyin Yang <sup>1,2,\*</sup>

***Affiliation:***

<sup>1</sup> *Key Laboratory of South China Agricultural Plant Molecular Analysis and Genetic Improvement & Guangdong Provincial Key Laboratory of Applied Botany, South China Botanical Garden, Chinese Academy of Sciences, Xingke Road 723, Tianhe District, Guangzhou 510650, China*

<sup>2</sup> *Center of Economic Botany, Core Botanical Gardens, Chinese Academy of Sciences, Xingke Road 723, Tianhe District, Guangzhou 510650, China*

† These authors equally contributed to this work.

\* **Corresponding author:** Ziyin Yang, South China Botanical Garden, Chinese Academy of Sciences, Xingke Road 723, Tianhe District, Guangzhou 510650, China; Tel: +86-20-38072989; Email address: zyyang@scbg.ac.cn.

## Supplementary data

**Table S1.** Primers of qRT-PCR used in this study

| Gene       | Primer                   |
|------------|--------------------------|
| CsAOC RF   | GCCAATCTCAGTCATCATCAA    |
| CsAOC RR   | GGAGCCACCATTAGTAACTTCAC  |
| CsLOX RF   | AAGCAAGACTCAATCACACCAT   |
| CsLOX RR   | GGCGTTCACCAACTCGTTA      |
| CsAOS RF   | ACAGAGTCATACCAGAGTTCCA   |
| CsAOS RR   | GCTTCCCTTCACTACCCAAT     |
| CsJAR RF   | CCACAACCTCCACTCCAGAAC    |
| CsJAR RR   | TGGCTCGTGAAGTCAACAAC     |
| CsJAZ1 RF  | CTTCTACAGGCGTCAGTTCAA    |
| CsJAZ1 RR  | CCCTCTCCTTGCGTTTCTC      |
| CsJAZ2 RF  | CTGTAGTTGTTGTGAAGGAAGAGG |
| CsJAZ2 RR  | TGAATCCAGAAGCAGCAAGTG    |
| CsJAZ3 RF  | AGGCTCAGGCTATTATGTTCTTG  |
| CsJAZ3 RR  | GCGTATTAGTAGGCTGGTTGAC   |
| CsJAZ4 RF  | CCTCAGGCTCGCTTACTCA      |
| CsJAZ4 RR  | GCTATTGGCACTGGCAGAT      |
| CsJAZ5 RF  | CGTCTGGTTCTGCTGATTCC     |
| CsJAZ5 RR  | TGGTTGTCGTTGCGGTTG       |
| CsJAZ6 RF  | GAGGAGGAATTGTAACCTGGAAC  |
| CsJAZ6 RR  | GGTGGTGGTGGTTGTAATCG     |
| CsJAZ7 RF  | ATCAACATCAACTTCTGGAGACTC |
| CsJAZ7 RR  | GGACAACCATAAGGCGACAA     |
| CsJAZ8 RF  | TGAAGACCGTGATCGCATCT     |
| CsJAZ8 RR  | CCGAAGGCAGGAGAATAGAGA    |
| CsMYC2a RF | CGCAGATATTCAACCAGGAGAG   |
| CsMYC2a RR | ACGGAGGATTGCCAGAAGA      |
| CsMYC2b RF | CCTATCAGAGCCAAGCCAATG    |
| CsMYC2b RR | TCTCCTCCGTCTTCTAACAG     |
| CsMYC2c RF | CACCACCAACTCCAACAA       |
| CsMYC2c RR | GCCGTCAAGCCAAGAGAG       |
| CsTSA RF   | ACCACACCTACTACTCCAACA    |
| CsTSA RR   | CTTACAGATACACGAGCACCAG   |
| CsTSB1 RF  | TCCCGGAATGAACTGGAATA     |
| CsTSB1 RR  | ATGTGCTCGGTTTGGCTTAG     |
| CsTSB2 RF  | CCTTATCTCCACGCCACTA      |
| CsTSB2 RR  | ACGACTATGCCGACTTGAAG     |
| CsTSB3 RF  | TCAAAGGTAAGGAGCAACAGC    |
| CsTSB3 RR  | TAGAGCCAGCACCGTGAGAT     |
| CsEF RF    | GTGTGGAGAAGAAGGACCCA     |
| CsEF RR    | CGAGGCTAGTGAACAGCAAC     |

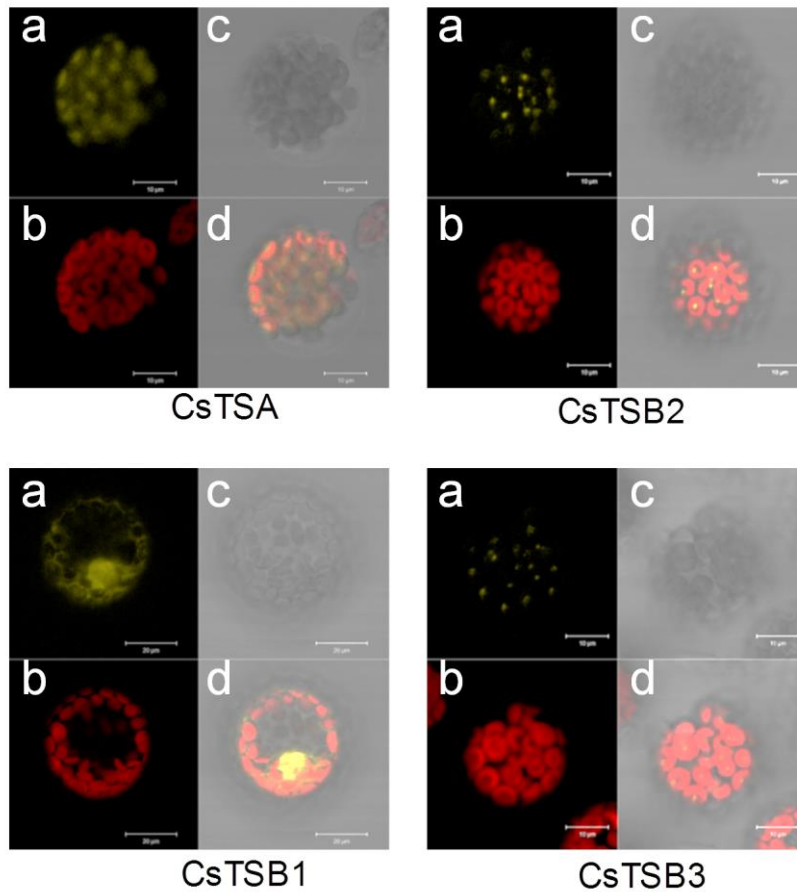

**Figure S1** Subcellular location of CsTSA, CsTSB1, CsTSB2 and CsTSB3.

The YFP-fused protein was transiently expressed in *Arabidopsis* mesophyll protoplasts. CsTSA, CsTSB2 and CsTSB3 were expressed in chloroplast, while CsTSB1 was expressed in cytoplasm and nucleus. a, YFP channel; b, chlorophyll auto fluorescence; c, bright field; d, merged images.

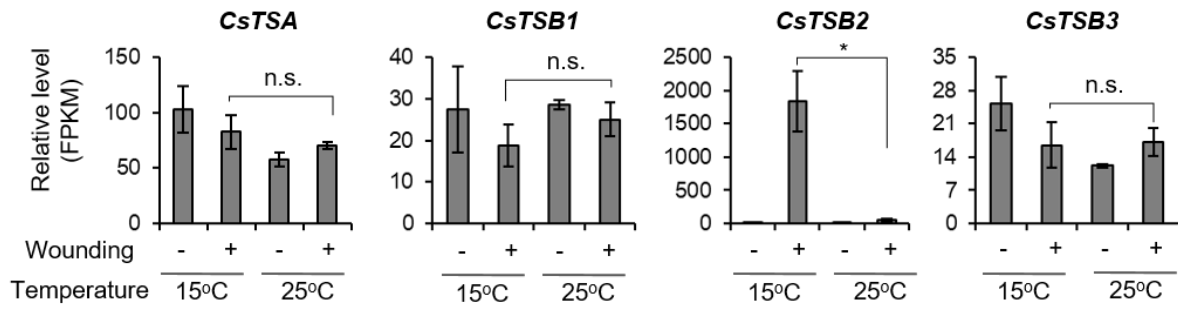

**Figure S2** Expression level of indole biosynthesis-related gene under different treatments at 16 h from RNA-seq data.

The gene expression level was analyzed by transcriptome analysis. The gene expression value was expressed as FPKM (fragments per kilobase million) value. \* indicates statistically significant differences (Student's *t*-test; \*\* $p \leq 0.05$ ; n.s. = not significant). Data are means of three independent experiments and error bars represent  $\pm$ SD.

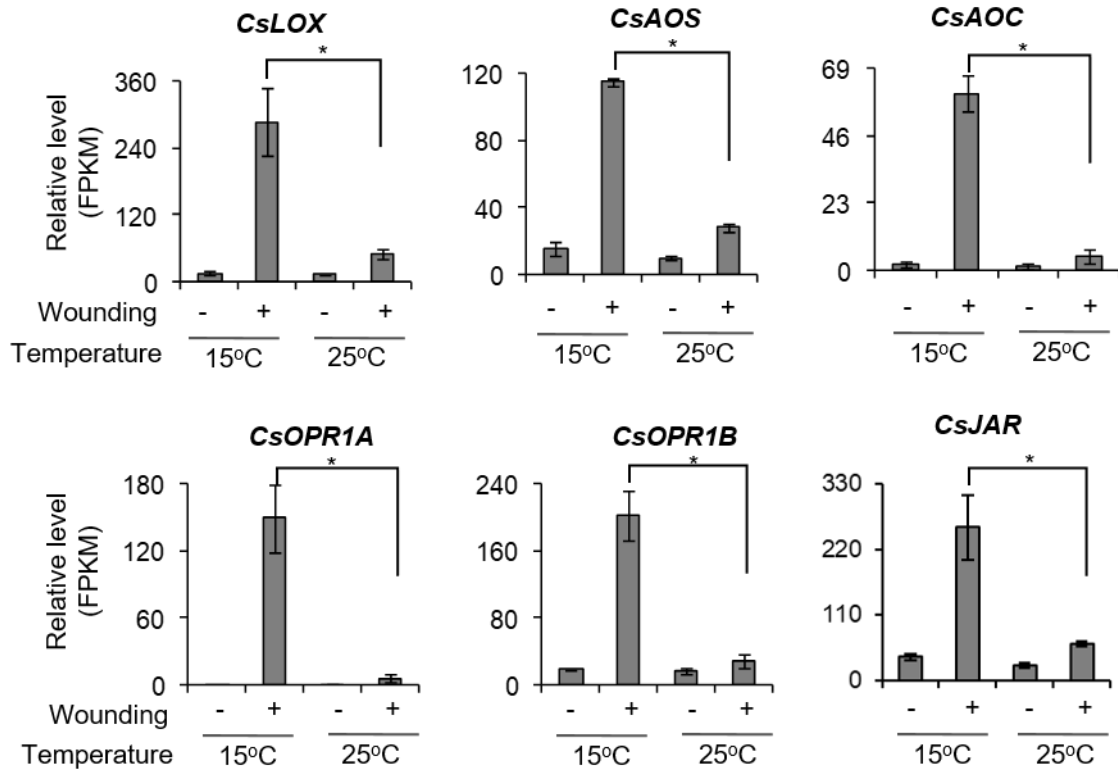

**Figure S3** Expression level of JA biosynthesis-related gene under different treatments at 16 h from RNA-seq data.

The gene expression level was analyzed by transcriptome analysis. The gene expression value was expressed as FPKM (fragments per kilobase million) value. CsLOX, 13-lipoxygenase; CsAOS, allene oxide synthase; CsAOC, allene oxide cyclase; CsOPR, 12-oxophytodienoate reductase; CsJAR, jasmonic acid-amido synthetase. \* indicates statistically significant differences (Student's *t*-test;  $p \leq 0.05$ ). Data are means of three independent experiments and error bars represent  $\pm$ SD.

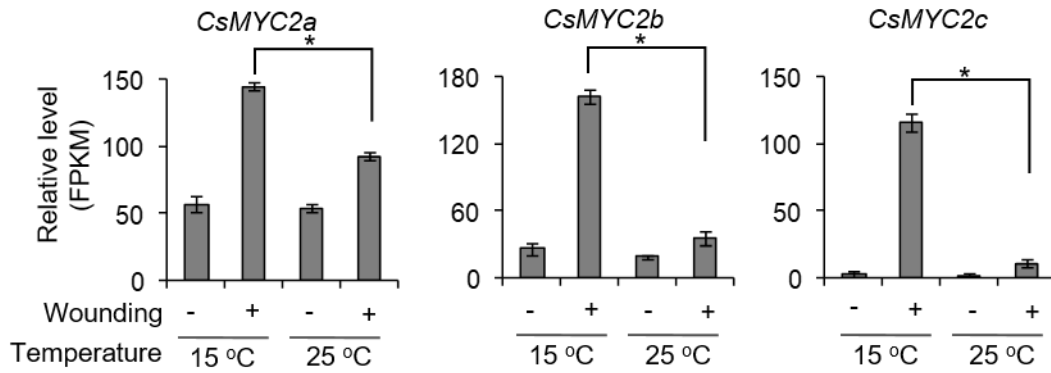

**Figure S4** Expression level of transcription factor *CsMYC2s* gene under different treatments at 16 h from RNA-seq data.

The gene expression level was analyzed by transcriptome analysis. The gene expression value was expressed as FPKM (fragments per kilobase million) value. \* indicates statistically significant differences (Student's *t*-test; \*\* $p \leq 0.05$ ). Data are means of three independent experiments and error bars represent  $\pm$ SD.

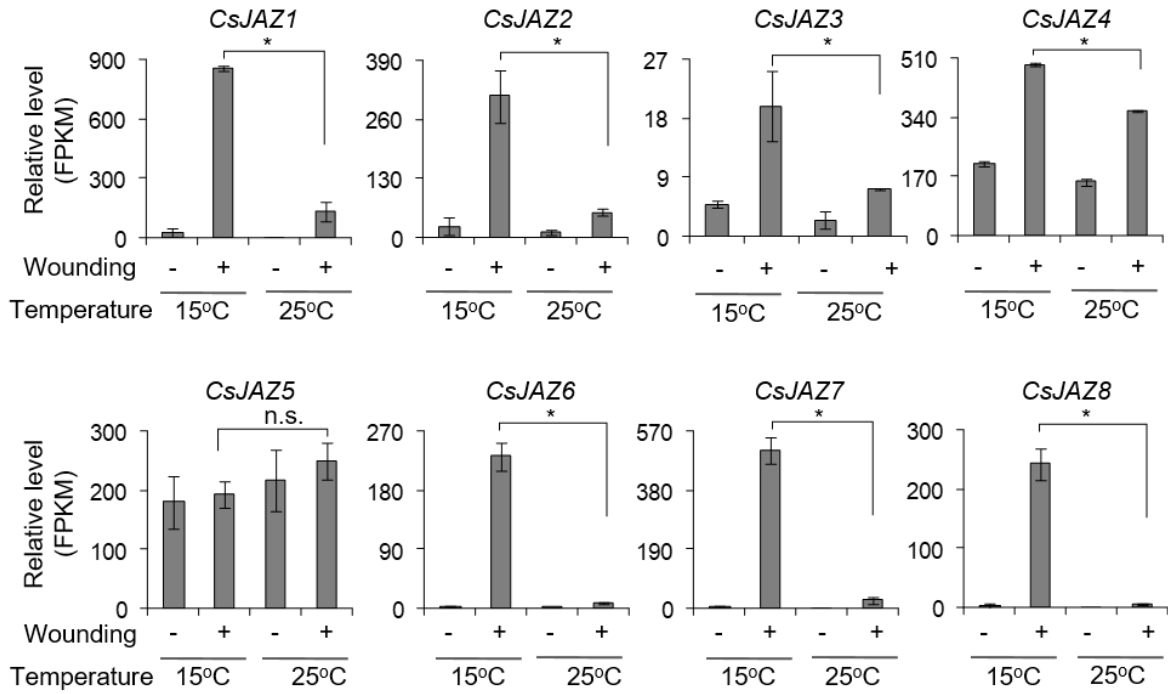

**Figure S5** Expression level of *CsJAZs* gene under different treatments at 16 h from RNA-seq data. The gene expression level was analyzed by transcriptome analysis. The gene expression value was expressed as FPKM (fragments per kilobase million) value. \* indicates statistically significant differences (Student's *t*-test; \*\* $p \leq 0.05$ ; n.s. = not significant). Data are means of three independent experiments and error bars represent  $\pm$ SD.

(A)

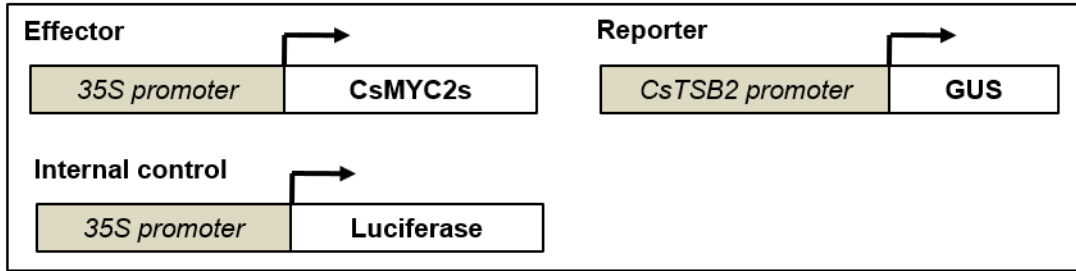

(B)

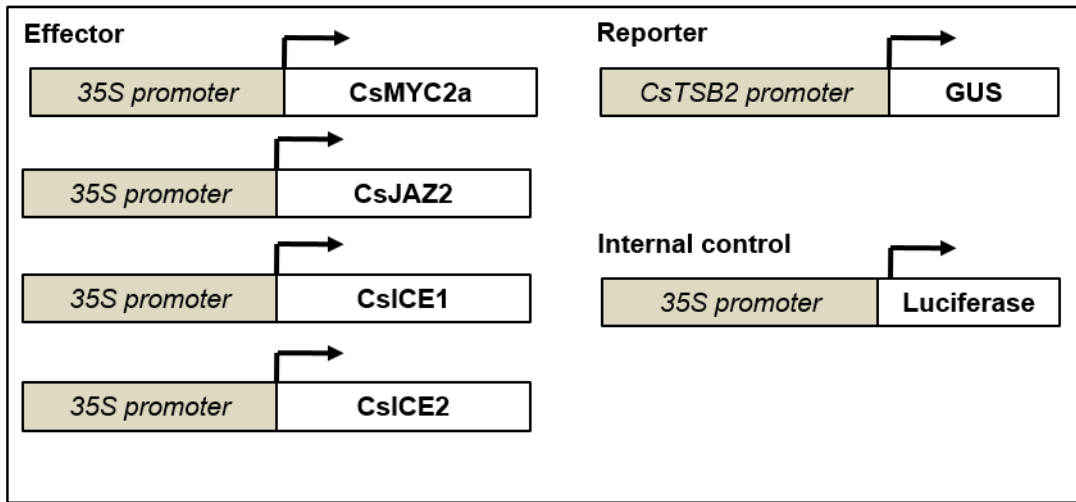

**Figure S6** Various constructs used in transient transactivation assays.

(A) Constructs used in Figure 5a and 5b. (b) Constructs used in Figure 7d.



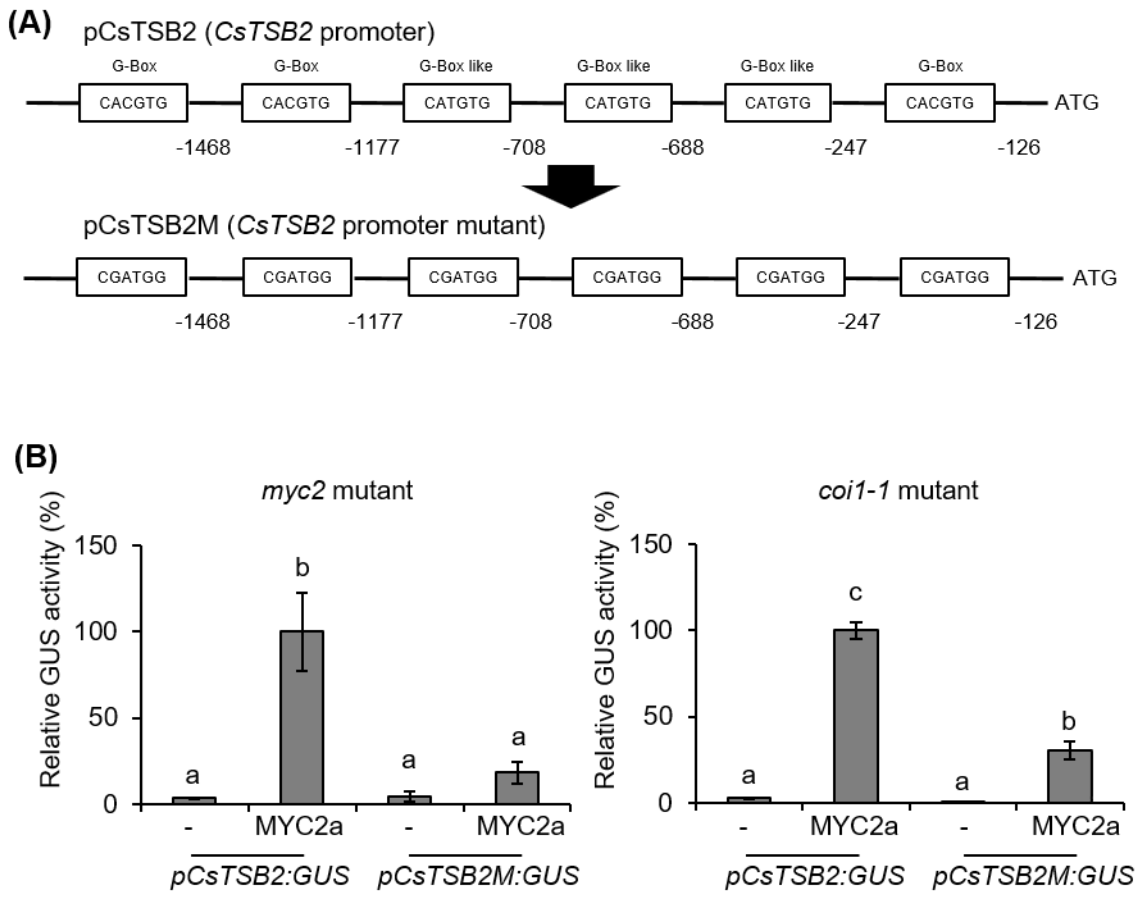

**Figure S7** Effect of G-box mutation in *CsTSB2* promoter on transcription activity of CsMYC2a to *CsTSB2*.

(A) Mutation of G-boxes and G-box-like elements in *CsTSB2* promoter. (B) Transient transactivation assays show that CsMYC2a lost binding activity to the mutated *CsTSB2* promoter significantly, and significantly reduced transcription activity of CsMYC2a to *CsTSB2* was observed both in *Arabidopsis myc2* and the *coi1-1* mutant mesophyll protoplast. *35S:LUC* was used as internal control. Different letters indicate statistically significant differences (one-way ANOVA followed by Duncan's multiple test,  $p \leq 0.05$ ). All data are means of three independent experiments and error bars represent  $\pm$ SD.

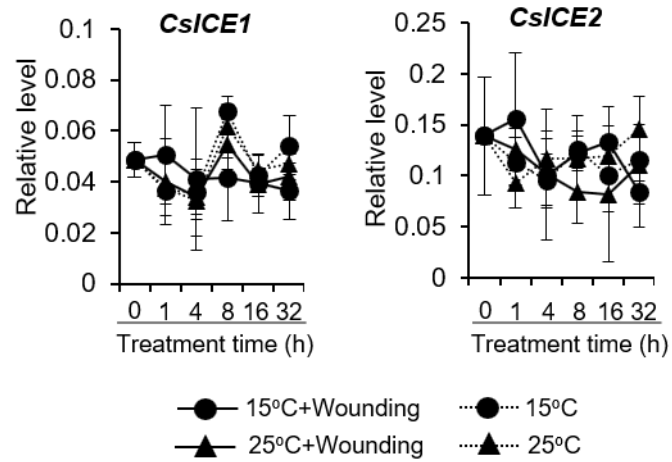

**Figure S8** Expression levels of *CsICE1* and *CsICE2* under different stresses.

The gene expression level was analyzed by qRT-PCR and calculated using the  $2^{-\Delta ct}$  method. All data are means of three independent experiments and error bars represent  $\pm$ SD.

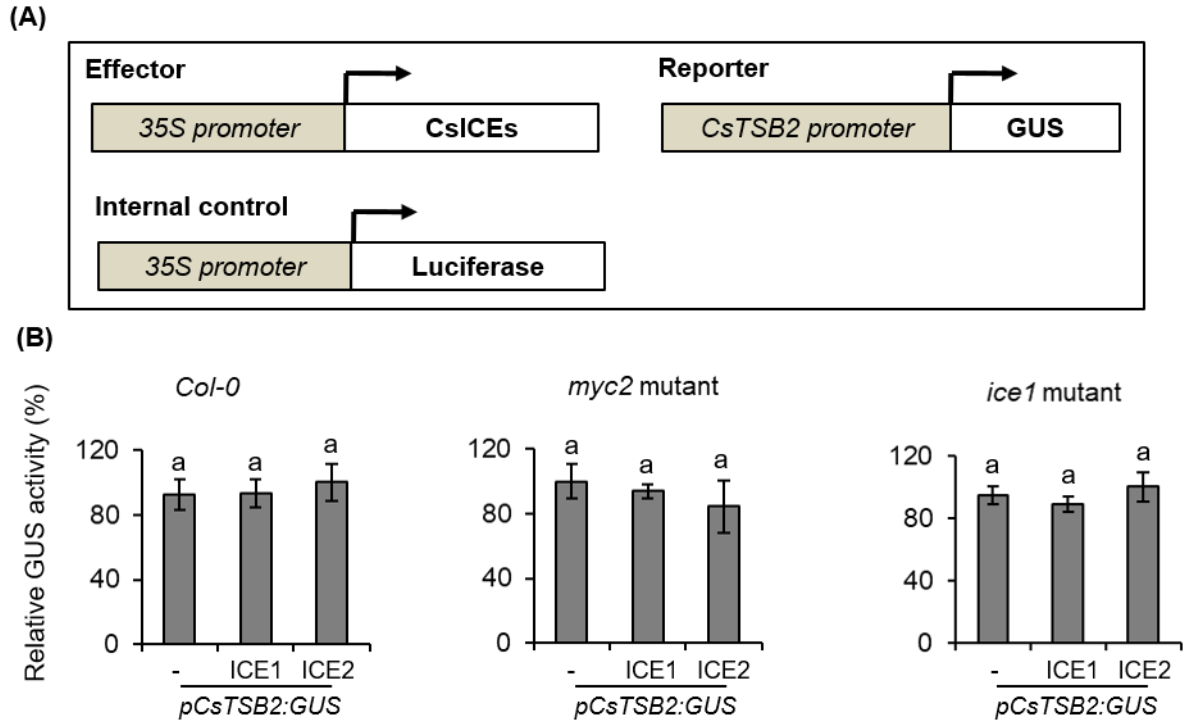

**Figure S9** Effect of CsICEs on *CsTSB2* expression.

(A) Constructs used in Figure S8B. (B) Transient transactivation assays show that CsICEs could not activate *CsTSB2* expression in *Arabidopsis Col-0*, *myc2* mutant and *coil-1* mutant mesophyll protoplast. *35S:LUC* was used as internal control. Different letters indicate statistically significant differences (one-way ANOVA followed by Duncan' multiple test,  $p \leq 0.05$ ). All data are means of three independent experiments and error bars represent  $\pm$ SD.

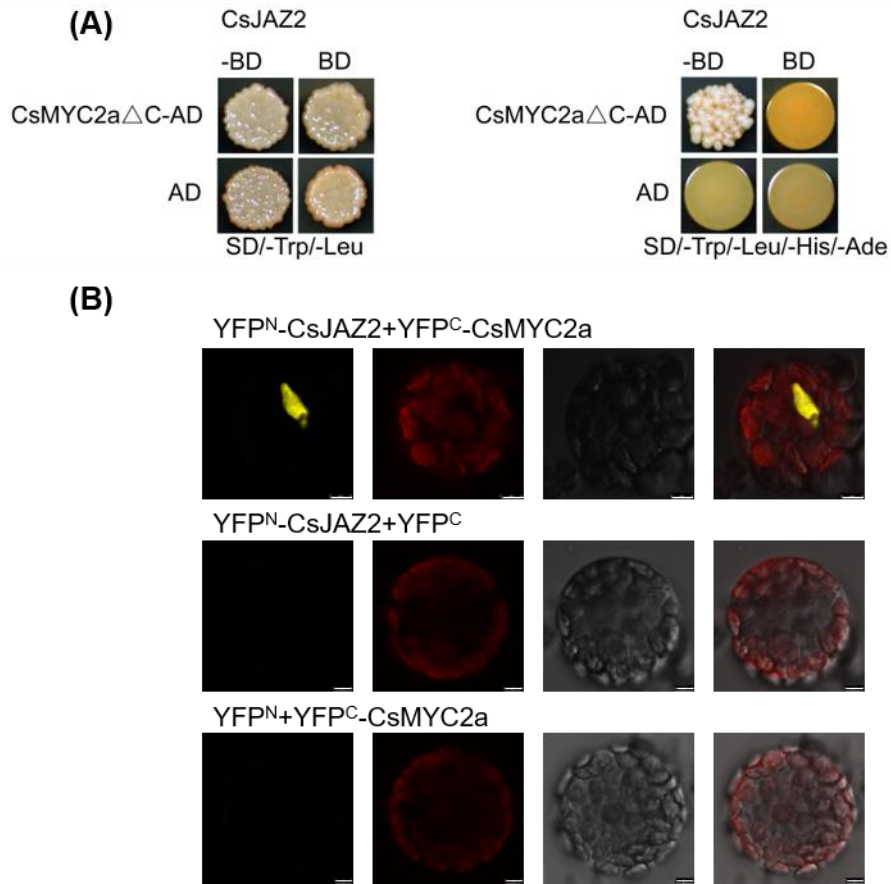

**Figure S10** Interaction of CsMYC2a with CsJAZ2.

(A) Yeast two-hybrid assay showed the interaction of CsMYC2a and CsJAZ2. Because the full-length CsMYC2a protein exhibited strong self-activation activity, the truncated version of CsMYC2a protein (corresponding to amino acid residues 1-200), which abolished CsMYC2a self-activation completely, was chosen. BD, pGBKT7; AD, pGADT7. (B) BiFC analysis showed the interaction of CsMYC2a and CsJAZ2 in the *Arabidopsis* mesophyll protoplast. From left to right: YFP channel, chlorophyll autofluorescence, bright field, merged images. Scale bar, 5  $\mu$ m.

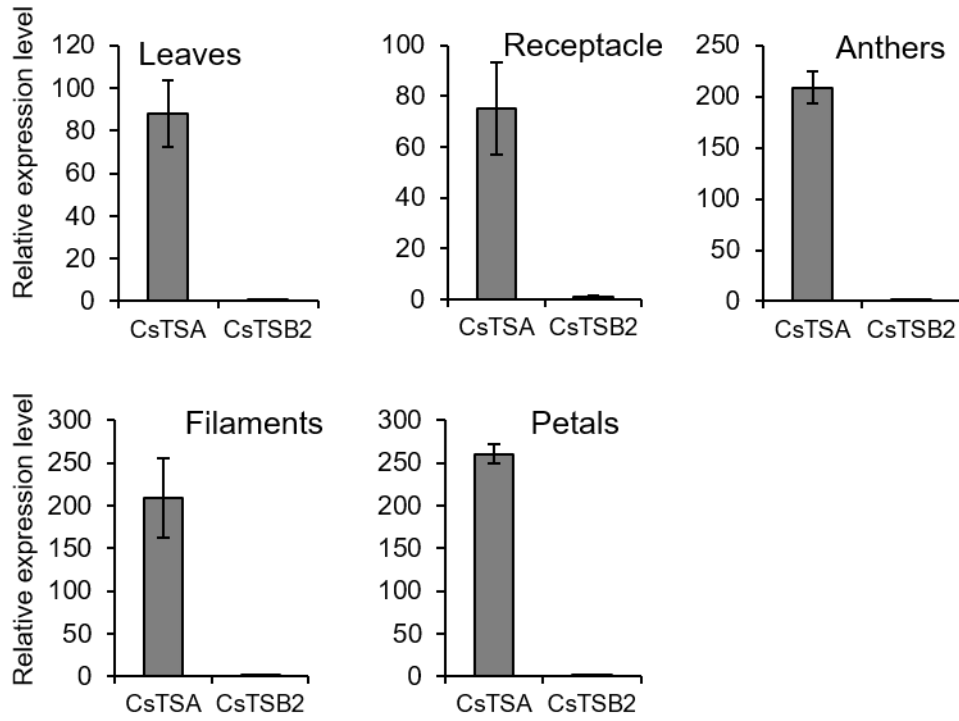

**Figure S11** Gene expression levels of *CsTSB2* and *CsTSA* in different tissues of *C. sinensis*. Tea flower was dissected into receptacle, filament, petal and anther. Gene expression level was analyzed by qRT-PCR.  $2^{-\Delta\Delta ct}$  method was used to analyze the data.

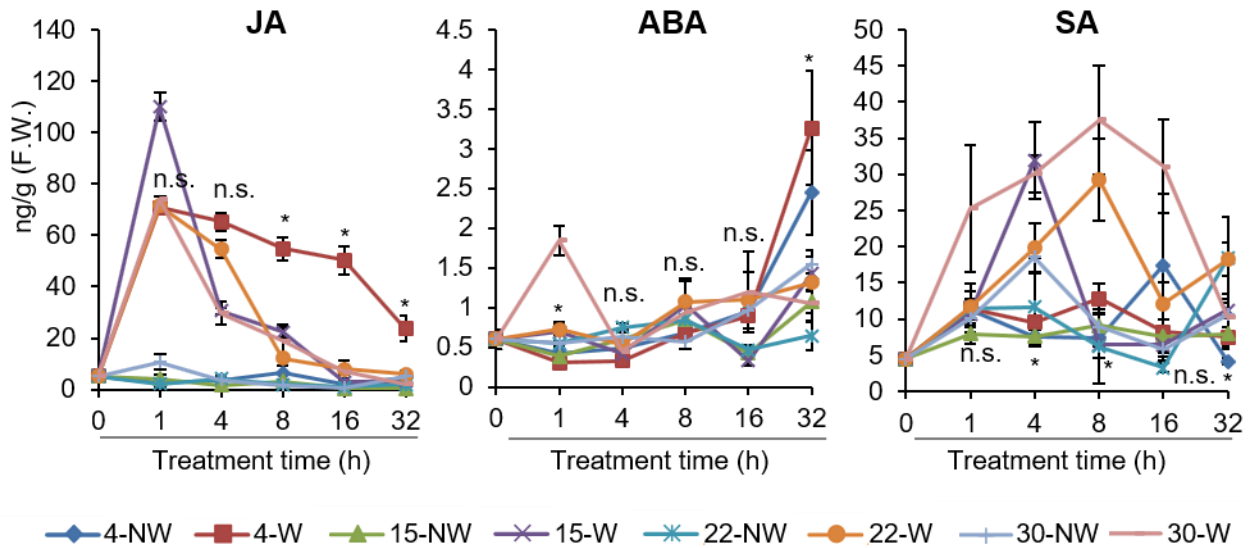

**Figure S12** Dynamic change of major phytohormones in *Arabidopsis* leaves incubated at different temperature after mechanical wounding.

*Arabidopsis* leaves were wounded using a syringe needle. The *Arabidopsis* plants were then incubated at different temperatures, including 4, 15, 22, and 30 °C after mechanical wounding. *Arabidopsis* plants incubated at 22 °C served as control. Leaves were collected at 0, 1, 4, 8, 16, and 32 h. The phytohormones of leaves, including JA, SA, and ABA, were analyzed by UPLC-QTOF-MS. Isotope-labeled phytohormone was used as internal standard. \* indicates statistically significant differences between wounded plants incubated at 4 and 22 °C (Student's *t*-test; \*  $p \leq 0.05$ ; n. s. = not significant). All data are means of three independent experiments and error bars represent  $\pm$ SD. NW: not wounded; W: wounded.
